# Supplementary material for: Prevalence and Effects of Functional Vitamin K Insufficiency: The PREVEND Study
Source: Nutrients. 2017 Dec 8;9(12):1334. doi: 10.3390/nu9121334 (PMC5748784; doi:10.3390/nu9121334)
Supplement: Supplementary file 1 [file nutrients-09-01334-s001.pdf]

**Supplementary Table S1.** Associations of log<sub>2</sub> dp-ucMGP with all-cause and cardiovascular mortality after exclusion of subjects who used vitamin K antagonists.

|                | All-Cause Mortality<br>(n <sub>events</sub> /n <sub>total</sub> = 222/4,169) |         | Cardiovascular Mortality<br>(n <sub>events</sub> /n <sub>total</sub> = 57/4,169) |         |
|----------------|------------------------------------------------------------------------------|---------|----------------------------------------------------------------------------------|---------|
|                | HR (95% CI)                                                                  | P-value | HR (95% CI)                                                                      | P-value |
| <b>Model 1</b> |                                                                              |         |                                                                                  |         |
| Linear term    | 0.24 (0.12-0.47)                                                             | <0.001  | 0.11 (0.04-0.28)                                                                 | <0.001  |
| Squared term   | 1.12 (1.07-1.17)                                                             | <0.001  | 1.18 (1.11-1.25)                                                                 | <0.001  |
| <b>Model 2</b> |                                                                              |         |                                                                                  |         |
| Linear term    | 0.38 (0.16-0.88)                                                             | 0.02    | 0.10 (0.03-0.36)                                                                 | 0.001   |
| Squared term   | 1.07 (1.01-1.13)                                                             | 0.02    | 1.16 (1.07-1.27)                                                                 | 0.001   |
| <b>Model 3</b> |                                                                              |         |                                                                                  |         |
| Linear term    | 0.32 (0.14-0.73)                                                             | 0.007   | 0.08 (0.02-0.31)                                                                 | <0.001  |
| Squared term   | 1.08 (1.02-1.14)                                                             | 0.006   | 1.17 (1.07-1.29)                                                                 | 0.001   |
| <b>Model 4</b> |                                                                              |         |                                                                                  |         |
| Linear term    | 0.30 (0.13-0.69)                                                             | 0.005   | 0.10 (0.02-0.40)                                                                 | 0.001   |
| Squared term   | 1.08 (1.03-1.14)                                                             | 0.003   | 1.15 (1.05-1.27)                                                                 | 0.003   |

Model 1: crude.

Model 2: adjusted for age and sex.

Model 3: as model 2 + race, smoking, education level, BMI, systolic blood pressure, cholesterol-HDL ratio, type 2 diabetes, history of cardiovascular disease, and use of antihypertensive drugs.

Model 4: as model 3 + eGFR and ln UAE.

Abbreviations: eGFR, estimated glomerular filtration rate; HDL, high-density lipoprotein; UAE, urinary albumin excretion.
